# Supplementary material for: Retinal Microvascular Changes in COVID-19 Bilateral Pneumonia Based on Optical Coherence Tomography Angiography
Source: MDPI journal article supplement (doi:10.3390/jcm11133621), 2022-06-23
Supplement: s1 [file s1]

Supplementary Table S5. Comparison of OCTA angiography (OCTA) parameters in COVID-19 patients and age, sex, and laterality-matched controls. Mean  $\pm$ SEM (standard error of the mean) structural OCTA values. Parafoveal area in SCP (superficial), DCP (deep capillary plexus), and CC (choriocapillaris) plexus. Bold values denote statistical significance at the  $p < 0.05$  level.

| <b>Parafoveal<br/>area</b>           | <b>COVID – 19 patients</b> |      |       |      | <b>Control group</b> |      |       |      | <b>p</b>           |
|--------------------------------------|----------------------------|------|-------|------|----------------------|------|-------|------|--------------------|
|                                      | M                          | SEM  | Me    | IQR  | M                    | SEM  | Me    | IQR  |                    |
| <b>Superficial</b>                   |                            |      |       |      |                      |      |       |      |                    |
| <b>Capillary<br/>Plexus (%)</b>      | 51.95                      | 0.22 | 52.39 | 2.81 | 51.84                | 0.28 | 51.85 | 3.44 | 0.620 <sup>B</sup> |
| <b>Deep Capillary<br/>Plexus (%)</b> | 54.29                      | 0.24 | 54.03 | 3.81 | 53.86                | 0.27 | 53.95 | 3.93 | 0.241 <sup>A</sup> |
| <b>Choriocapillaris<br/>(%)</b>      | 66.86                      | 0.12 | 66.91 | 1.50 | 66.91                | 0.20 | 66.97 | 1.97 | 0.456 <sup>B</sup> |
