# Supplementary material for: Retinal Microvascular Changes in COVID-19 Bilateral Pneumonia Based on Optical Coherence Tomography Angiography
Source: MDPI journal article supplement (doi:10.3390/jcm11133621), 2022-06-23
Supplement: s1 [file s1]

Supplementary Table S3. Comparison of optic nerve average total RNFL thickness, Average superior and Average inferior RNFL thickness in COVID-19 patients, and age, sex, and laterality-matched controls. Mean  $\pm$ SEM (standard error of the mean) structural OCT values. Bold values denote statistical significance at the  $p < 0.05$  level.

| Optic nerve head                | COVID– 19 patients |      |        |       | Control group |      |        |       | p                         |
|---------------------------------|--------------------|------|--------|-------|---------------|------|--------|-------|---------------------------|
|                                 | M                  | SEM  | Me     | IQR   | M             | SEM  | Me     | IQR   |                           |
| Average total RNFL thickness    | 106.30             | 0.89 | 106.50 | 11.00 | 103.63        | 1.17 | 104.00 | 10.00 | 0.068 <sub>A</sub>        |
| Average superior RNFL thickness | 132.49             | 1.33 | 131.50 | 18.00 | 127.63        | 1.43 | 129.00 | 17.00 | <b>0.021</b> <sub>B</sub> |
| Average inferior RNFL thickness | 136.42             | 1.33 | 136.00 | 16.00 | 131.68        | 2.01 | 131.00 | 20.00 | <b>0.010</b> <sub>B</sub> |
