# Supplementary material for: Retinal Microvascular Changes in COVID-19 Bilateral Pneumonia Based on Optical Coherence Tomography Angiography
Source: MDPI journal article supplement (doi:10.3390/jcm11133621), 2022-06-23
Supplement: s1 [file s1]

Supplementary Table S10. Comparison between men and women in COVID-19 group in OCT parameters: vessel density in foveal (F), inferior (I),superior (S), nasal(N), temporal(T) area in SCP (superficial), DCP (deep capillary plexus), and CC (choriocapillaris) plexus, foveal avascular zone in superficial capillary plexus (FAZs), foveal avascular zone in deep capillary plexus (FAZd), Retinal Nerve Fiber Layer (RNFL) optic disc – inferior area (I), superior area (S),nasal area (N), temporal area (T), Retinal Thickness in inner inferior ring (II), inner superior ring (IS), inner nasal ring (IN), inner temporal ring (IT), outer inferior ring (OI), outer superior ring (OS), outer nasal ring (ON), outer temporal ring (OT), Retinal Nerve Fiber Layer (RNFL) in inner inferior ring (II), inner superior ring (IS), inner nasal ring (IN), inner temporal ring (IT), outer inferior ring (OI), outer superior ring (OS), outer nasal ring (ON), outer temporal ring (OT), Ganglion Cell Layer (GCL) in inner inferior ring (II), inner superior ring (IS), inner nasal ring (IN), inner temporal ring (IT), outer inferior ring (OI), outer superior ring (OS), outer nasal ring (ON), outer temporal ring (OT), Choroidal Thickness (BMCSI) in inner inferior ring (II), inner superior ring (IS), inner nasal ring (IN), inner temporal ring (IT), outer inferior ring (OI), outer superior ring (OS), outer nasal ring (ON), outer temporal ring (OT). Bold values denote statistical significance at the  $p<0,05$  level.

| Variables       | Men          |             | Women       |             | P                   |
|-----------------|--------------|-------------|-------------|-------------|---------------------|
|                 | M(SEM)       | Me (IQR)    | M(SEM)      | Me (IQR)    |                     |
| OCT A_F_SCP (%) | 21.72(0.40)  | 21.65(4.69) | 18.48(0.77) | 18.38(5.02) | <0.001 <sup>B</sup> |
| OCT A_F_DCP (%) | 17.30(0.51)  | 16.90(4.29) | 17.04(0.82) | 17.63(5.21) | 0.884 <sup>B</sup>  |
| OCT A_F_CC (%)  | 52.03(0.44)  | 52.82(4.29) | 50.21(0.71) | 49.39(4.61) | 0.009 <sup>B</sup>  |
| OCT A_S_SCP (%) | 48.10(0.29)  | 48.48(2.92) | 48.65(0.46) | 48.39(2.27) | 0.226 <sup>B</sup>  |
| OCT A_S_DCP (%) | 52.43(0.33)  | 52.46(4.31) | 50.99(0.60) | 51.17(5.35) | 0.025 <sup>A</sup>  |
| OCT A_S_CC (%)  | 53.97(0.21)  | 54.10(2.43) | 54.26(0.38) | 54.18(2.84) | 0.984 <sup>B</sup>  |
| OCT A_N_SCP (%) | 45.03(0.28)  | 45.17(3.26) | 45.28(0.38) | 45.46(3.59) | 0.526 <sup>B</sup>  |
| OCT A_N_DCP (%) | 49.26(0.30)  | 49.16(3.29) | 48.51(0.57) | 47.69(4.43) | 0.043 <sup>B</sup>  |
| OCT A_N_CC (%)  | 53.60 (0.23) | 53.45(2.48) | 53.61(0.33) | 53.60(1.82) | 0.987 <sup>A</sup>  |
| OCT A_I_SCP (%) | 46.98(0.42)  | 47.53(3.94) | 47.70(0.90) | 48.41(2.54) | 0.039 <sup>B</sup>  |
| OCT A_I_DCP (%) | 51.52(0.45)  | 51.41(5.30) | 50.85(0.61) | 50.02(4.71) | 0.239 <sup>B</sup>  |
| OCT A_I_CC (%)  | 54.37(0.25)  | 54.36(2.95) | 54.29(0.36) | 54.31(3.49) | 0.862 <sup>A</sup>  |
| OCT A_T_SCP (%) | 46.40(0.26)  | 46.30(2.84) | 47.22(0.31) | 47.08(2.72) | 0.062 <sup>A</sup>  |
| OCT A_T_DCP (%) | 47.93(0.27)  | 47.88(3.38) | 46.87(0.44) | 47.26(3.81) | 0.036 <sup>A</sup>  |
| OCT A_T_CC (%)  | 53.87(0.21)  | 53.91(2.27) | 54.22(0.29) | 53.91(2.57) |                     |

|                         |               |                |               |                |                     |
|-------------------------|---------------|----------------|---------------|----------------|---------------------|
| FAZs( $\mu\text{m}^2$ ) | 303.02(10.28) | 299.79(95.58)  | 377.81(19.65) | 372.16(115.08) | <0.00 <sup>A</sup>  |
| FAZd( $\mu\text{m}^2$ ) | 342.73(15.68) | 329.80(172.35) | 380.19(21.99) | 363.92(139.94) | 0.111 <sup>B</sup>  |
| RNFL OPTIC DISC_S       | 132.89(1.52)  | 131.00(19.00)  | 132.19(2.66)  | 136.00(14.00)  | 0.571 <sup>B</sup>  |
| RNFL OPTIC DISC_N       | 83.34(1.58)   | 85.00(19.50)   | 83.46(14.00)  | 87.00(2.40)    | 0.966 <sup>A</sup>  |
| RNFL OPTIC DISC_I       | 134.30(2.10)  | 135.00(16.00)  | 137.57(15.00) | 137.00(2.34)   | 0.395 <sup>B</sup>  |
| RNFL OPTIC DISC_T       | 79.03(6.22)   | 71.00(18.50)   | 72.97(1.48)   | 73.00(9.00)    | 0.790 <sup>B</sup>  |
| F_RETINAL THICKNESS     | 249.45(2.93)  | 254.00(24.00)  | 236.05(3.25)  | 239.00(25.00)  | <0.001 <sup>B</sup> |
| IS RETINAL THICKNESS    | 321.23(1.78)  | 321.50(20.00)  | 312.32(2.54)  | 311.00(19.00)  | 0.001 <sup>B</sup>  |
| IN RETINAL THICKNESS    | 320.87(1.87)  | 319.00(21.00)  | 311.08(2.94)  | 309.00(27.00)  | 0.005 <sup>B</sup>  |
| II RETINAL THICKNESS    | 318.10(1.67)  | 317.00(15.00)  | 309.19(2.72)  | 307.00(22.00)  | 0.002 <sup>B</sup>  |
| IT RETINAL THICKNESS    | 308.50(2.30)  | 309.00(20.00)  | 295.76(2.86)  | 295.00(26.00)  | <0.001 <sup>B</sup> |
| OS RETINAL THICKNESS    | 277.94(1.41)  | 277.50(17.00)  | 277.38(3.30)  | 274.00(14.00)  | 0.096 <sup>B</sup>  |
| ON RETINAL THICKNESS    | 292.28(1.82)  | 290.50(21.00)  | 287.22(2.62)  | 286.00(13.00)  | 0.082 <sup>B</sup>  |
| OI RETINAL THICKNESS    | 267.65(1.44)  | 266.00(19.00)  | 262.78(2.19)  | 260.00(11.00)  | 0.023 <sup>B</sup>  |
| OT RETINAL THICKNESS    | 262.22(1.88)  | 263.50(16.00)  | 254.43(2.08)  | 253.00(11.00)  | <0.001 <sup>B</sup> |
| RNFL RETINA F           | 3.88(0.29)    | 3.00(3.00)     | 2.92(0.35)    | 2.00(4.000)    | 0.023 <sup>B</sup>  |
| RNFL RETINA_IS          | 29.39(0.29)   | 29.00(4.00)    | 28.62(0.44)   | 28.00(3.00)    | 0.142 <sup>A</sup>  |
| RNFL RETINA_IN          | 24.54(0.26)   | 25.00(3.00)    | 23.65(0.36)   | 24.00(3.00)    | 0.022 <sup>B</sup>  |
| RNFL RETINA_II          | 29.94(0.42)   | 30.00(3.00)    | 28.59(0.41)   | 29.00(4.00)    | 0.007 <sup>B</sup>  |
| RNFL RETINA_IT          | 20.71(0.26)   | 21.00(3.00)    | 18.54(0.43)   | 18.00(3.000)   | <0.001 <sup>B</sup> |
| RNFL RETINA_OS          | 41.22(0.61)   | 41.00(9.00)    | 43.16(1.04)   | 42.00(6.00)    | 0.171 <sup>B</sup>  |
| RNFL RETINA_ON          | 52.59(0.98)   | 53.00(11.00)   | 52.38(1.19)   | 52.00(9.00)    | 0.901 <sup>A</sup>  |
| RNFL RETINA_OI          | 43.65(0.71)   | 45.00(9.00)    | 43.81(1.28)   | 42.00(7.000)   | 0.540 <sup>B</sup>  |
| RNFL RETINA_OT          | 23.60(0.46)   | 24.00(3.00)    | 22.03(0.51)   | 21.00(5.00)    | 0.022 <sup>B</sup>  |
| GCL F                   | 52.62(1.32)   | 51.50(12.00)   | 46.16(1.59)   | 45.00(10.00)   | 0.002 <sup>B</sup>  |
| GCL_IS                  | 123.37(1.04)  | 124.50(12.00)  | 121.11(1.51)  | 123.00(12.000) | 0.176 <sup>B</sup>  |
| GCL_IN                  | 119.11(1.03)  | 119.50(13.00)  | 115.84(1.68)  | 117.00(14.00)  | 0.103 <sup>B</sup>  |
| GCL_II                  | 123.16(1.25)  | 125.00(10.00)  | 118.24(3.22)  | 121.00(18.00)  | 0.164 <sup>B</sup>  |
| GCL_IT                  | 112.34(1.03)  | 114.00(8.00)   | 107.08(1.39)  | 108.00(13.00)  | 0.002 <sup>B</sup>  |
| GCL_OS                  | 105.98(1.01)  | 106.00(14.00)  | 107.41(1.58)  | 107.00(6.00)   | 0.673 <sup>B</sup>  |

|             |              |               |               |                |                    |
|-------------|--------------|---------------|---------------|----------------|--------------------|
| GCL_ON      | 122.37(1.29) | 122.00(12.00) | 122.22(1.88)  | 123.00(11.00)  | 0.966 <sup>B</sup> |
| GCL_OI      | 105.57(1.09) | 106.50(12.00) | 105.78(1.67)  | 104.00(8.00)   | 0.692 <sup>B</sup> |
| GCL_OT      | 94.22(0.86)  | 95.00(9.00)   | 90.54(1.33)   | 90.00(7.00)    | 0.005 <sup>B</sup> |
| BMCSI F     | 271.22(7.76) | 265.00(89.00) | 257.97(11.97) | 242.00(104.00) | 0.349 <sup>A</sup> |
| BMCSI IR_IS | 272.23(7.05) | 275.00(76.00) | 260.78(10.66) | 247.00(85.00)  | 0.369 <sup>A</sup> |
| BMCSI IR_IN | 253.34(7.32) | 246.00(99.00) | 243.84(11.97) | 245.00(104.00) | 0.484 <sup>A</sup> |
| BMCSI IR_II | 262.76(7.68) | 268.50(88.00) | 245.49(11.66) | 239.00(112.00) | 0.215 <sup>A</sup> |
| BMCSI IR_IT | 259.11(7.64) | 258.50(87.00) | 257.30(11.02) | 248.00(83.00)  | 0.894 <sup>A</sup> |
| BMCSI OR_OS | 271.50(6.11) | 268.00(79.00) | 254.03(10.97) | 236.00(76.00)  | 0.138 <sup>F</sup> |
| BMCSI OR_ON | 199.85(6.75) | 191.50(88.00) | 203.81(13.04) | 193.00(121.00) | 0.767 <sup>A</sup> |
| BMCSI OR_OI | 241.02(7.30) | 239.00(79.00) | 239.51(12.97) | 226.00(104.00) | 0.914 <sup>A</sup> |
| BMCSI OR_OT | 236.04(6.97) | 233.50(75.00) | 242.11(9.85)  | 230.00(81.00)  | 0.669 <sup>B</sup> |

<sup>A</sup> – t Student test; <sup>B</sup> – Mann-Whitney test;
