# Supplementary material for: Retinal Microvascular Changes in COVID-19 Bilateral Pneumonia Based on Optical Coherence Tomography Angiography
Source: MDPI journal article supplement (doi:10.3390/jcm11133621), 2022-06-23
Supplement: s1 [file s1]

Supplementary Table S9. Comparison of OCTA angiography (OCTA) parameters in COVID-19 patients and age, sex and laterality-matched controls. Mean  $\pm$ SEM (standard error of the mean) structural OCTA values. The nasal area in SCP (superficial), DCP (deep capillary plexus) and CC (choriocapillaris) plexus. Bold values denote statistical significance at the  $p < 0,05$  level.

| <b>Nasal area</b>                | <b>COVID – 19 patients</b> |      |       |      | <b>Control group</b> |      |       |      | <b>p</b>           |
|----------------------------------|----------------------------|------|-------|------|----------------------|------|-------|------|--------------------|
|                                  | M                          | SEM  | Me    | IQR  | M                    | SEM  | Me    | IQR  |                    |
| <b>Superficial</b>               |                            |      |       |      |                      |      |       |      |                    |
| <b>Capillary Plexus (%)</b>      | 45.05                      | 0.23 | 45.23 | 3.59 | 44.99                | 0.27 | 45.05 | 3.57 | 0.569 <sup>B</sup> |
| <b>Deep Capillary Plexus (%)</b> | 49.04                      | 0.27 | 48.60 | 3.85 | 48.45                | 0.32 | 47.91 | 4.18 | 0.160 <sup>A</sup> |
| <b>Choriocapillaris (%)</b>      | 53.61                      | 0.19 | 53.57 | 2.26 | 53.22                | 0.25 | 53.32 | 2.89 | 0.351 <sup>B</sup> |
