# Supplementary material for: Retinal Microvascular Changes in COVID-19 Bilateral Pneumonia Based on Optical Coherence Tomography Angiography
Source: MDPI journal article supplement (doi:10.3390/jcm11133621), 2022-06-23
Supplement: s1 [file s1]

Supplementary Table S8. Comparison of OCTA angiography (OCTA) parameters in COVID-19 patients and age, sex, and laterality-matched controls. Mean  $\pm$ SEM (standard error of the mean) structural OCTA values. The temporal area in SCP (superficial), DCP (deep capillary plexus), and CC (choriocapillaris) plexus. Bold values denote statistical significance at the  $p < 0,05$  level.

| <b>Temporal<br/>area</b>                        | <b>COVID – 19 patients</b> |      |       |      | <b>Control group</b> |      |       |      | <b>p</b>           |
|-------------------------------------------------|----------------------------|------|-------|------|----------------------|------|-------|------|--------------------|
|                                                 | M                          | SEM  | Me    | IQR  | M                    | SEM  | Me    | IQR  |                    |
| <b>Superficial<br/>Capillary<br/>Plexus (%)</b> | 46.66                      | 0.20 | 46.60 | 2.76 | 46.44                | 0.24 | 46.52 | 3.29 | 0.538 <sup>B</sup> |
| <b>Deep Capillary<br/>Plexus (%)</b>            | 47.61                      | 0.23 | 47.77 | 3.33 | 47.20                | 0.33 | 46.93 | 4.39 | 0.212 <sup>B</sup> |
| <b>Choriocapillaris<br/>(%)</b>                 | 53.99                      | 0.17 | 53.93 | 2.59 | 53.50                | 0.50 | 54.06 | 2.43 | 0.967 <sup>B</sup> |
