# Supplementary material for: Retinal Microvascular Changes in COVID-19 Bilateral Pneumonia Based on Optical Coherence Tomography Angiography
Source: MDPI journal article supplement (doi:10.3390/jcm11133621), 2022-06-23
Supplement: s1 [file s1]

Supplementary Table S6. Comparison of OCTA angiography (OCTA) parameters in COVID-19 patients and age, sex, and laterality-matched controls. Mean±SEM (standard error of the mean) structural OCTA values. The superior area in SCP (superficial), DCP (deep capillary plexus), and CC (choriocapillaris) plexus. Bold values denote statistical significance at the  $p<0,05$  level.

| <b>Superior<br/>area</b>                        | <b>COVID – 19 patients</b> |      |       |      | <b>Control group</b> |      |       |      | <b>p</b>           |
|-------------------------------------------------|----------------------------|------|-------|------|----------------------|------|-------|------|--------------------|
|                                                 | M                          | SEM  | Me    | IQR  | M                    | SEM  | Me    | IQR  |                    |
| <b>Superficial<br/>Capillary<br/>Plexus (%)</b> | 48.28                      | 0.25 | 48.45 | 2.74 | 48.23                | 0.37 | 48.19 | 3.84 | 0.374 <sup>B</sup> |
| <b>Deep Capillary<br/>Plexus (%)</b>            | 51.99                      | 0.30 | 52.10 | 4.52 | 52.18                | 0.40 | 51.89 | 4.63 | 0.688 <sup>A</sup> |
| <b>Choriocapillaris<br/>(%)</b>                 | 54.06                      | 0.18 | 54.15 | 2.42 | 54.24                | 0.28 | 54.23 | 2.44 | 0.422 <sup>B</sup> |
