# Supplementary material for: Retinal Microvascular Changes in COVID-19 Bilateral Pneumonia Based on Optical Coherence Tomography Angiography
Source: MDPI journal article supplement (doi:10.3390/jcm11133621), 2022-06-23
Supplement: s1 [file s1]

Supplementary Table S2. Comparison of foveal (F) parameters of RNFL RETINA, GCL, BMCSI, RETINAL THICKNESS angiography (OCTA) parameters in COVID-19 patients and age, sex, and laterality-matched controls. Mean  $\pm$ SEM (standard error of the mean) structural OCT values. Bold values denote statistical significance at the  $p < 0.05$  level.

| Foveal area       | COVID – 19 patients |      |        |       | Control group |      |        |       | p                  |
|-------------------|---------------------|------|--------|-------|---------------|------|--------|-------|--------------------|
|                   | M                   | SEM  | Me     | IQR   | M             | SEM  | Me     | IQR   |                    |
| RNFL RETINA       | 3.57                | 0.23 | 3.00   | 3.00  | 3.31          | 0.24 | 3.00   | 2.00  | 0.333 <sup>A</sup> |
| GCL               | 50.63               | 1.06 | 49.50  | 12.00 | 49.33         | 1.11 | 48.00  | 16.00 | 0.485 <sup>A</sup> |
| BMCSI             | 266.41              | 6.49 | 260.50 | 95.50 | 278.58        | 8.27 | 273.00 | 98.00 | 0.243 <sup>A</sup> |
| RETINAL THICKNESS | 245.39              | 2.30 | 249.00 | 80.00 | 244.02        | 2.12 | 243.00 | 22.00 | 0.278 <sup>B</sup> |

<sup>A</sup> – t Student test; <sup>B</sup> Mann – Whitney test.
