# Supplementary material for: Retinal Microvascular Changes in COVID-19 Bilateral Pneumonia Based on Optical Coherence Tomography Angiography
Source: MDPI journal article supplement (doi:10.3390/jcm11133621), 2022-06-23
Supplement: s1 [file s1]

Supplementary Table S4. Comparison of foveal (F) and inner ring superior (IS(IR)), inner nasal (IN(IR)), inner ring inferior (II(IR)), inner ring temporal (IT(IR)), outer ring superior (OS(OR)), outer ring nasal (ON(OR)), outer ring inferior (OI(OR)), outer ring temporal (OT(OR)) parameters of GCL parameters in COVID-19 patients and age, sex, and laterality-matched controls. Mean  $\pm$ SEM (standard error of the mean) structural OCT values. Bold values denote statistical significance at the  $p < 0.05$  level.

| GCL   | COVID – 19 patients |      |        |       | Control group |      |        |       | p                         |
|-------|---------------------|------|--------|-------|---------------|------|--------|-------|---------------------------|
|       | M                   | SEM  | Me     | IQR   | M             | SEM  | Me     | IQR   |                           |
| F     | 50.63               | 1.06 | 49.50  | 12.00 | 49.33         | 1.11 | 48.00  | 16.00 | 0.485 <sup>A</sup>        |
| IS_IR | 122.79              | 0.86 | 123.50 | 12.00 | 119.66        | 1.09 | 119.00 | 12.00 | <b>0.012</b> <sup>B</sup> |
| IN_IR | 118.21              | 0.89 | 119.00 | 13.00 | 115.41        | 1.14 | 115.00 | 14.00 | <b>0.023</b> <sup>B</sup> |
| II_IR | 121.77              | 1.33 | 124.00 | 11.50 | 120.51        | 1.17 | 120.00 | 12.00 | 0.081 <sup>B</sup>        |
| IT_IR | 110.85              | 0.86 | 112.00 | 9.50  | 108.72        | 1.00 | 107.00 | 12.00 | <b>0.023</b> <sup>B</sup> |
| OS_OR | 106.47              | 0.85 | 106.00 | 11.00 | 113.31        | 9.58 | 104.00 | 13.00 | 0.126 <sup>B</sup>        |
| ON_OR | 122.41              | 1.05 | 122.00 | 12.00 | 119.58        | 1.27 | 118.00 | 12.00 | 0.088 <sup>B</sup>        |
| OI_OR | 105.72              | 0.90 | 106.00 | 11.50 | 102.65        | 1.06 | 103.00 | 12.00 | <b>0.029</b> <sup>A</sup> |
| OT_OR | 93.14               | 0.73 | 93.00  | 9.50  | 91.47         | 0.83 | 91.00  | 8.00  | 0.136 <sup>A</sup>        |

<sup>A</sup> – t Student test; <sup>B</sup> Mann – Whitney test.
